1           **High conservation priority of range-edge plant populations not matched by habitat**  
2                                                           **protection or research effort**

3  
4   **Running head:** Conserving range-edge plant populations

5  
6 P. Caissy<sup>1\*†</sup>, S. Klemet-N'Guessan<sup>1\*†††</sup>, R. Jackiw<sup>2</sup>, C.G. Eckert<sup>2</sup>, A. L. Hargreaves<sup>1†††</sup>

7 \*joint first-authors.

8 1. Department of Biology, McGill University, 1205 Dr Penfield Ave, Montreal QC, Canada,  
9 H3A 1B1

10 2. Department of Biology, Queen's University, 116 Barrie St., Kingston ON, Canada, K7L 3N6

11 †Present address: Département de Biologie, Université Laval, 1045 Avenue de la Médecine,  
12 local 3058, Québec, QC, Canada, G1V 0A6.

13 ††Present address: Department of Biology, Trent University, 2140 East Bank Drive,  
14 Peterborough, ON, Canada, K9L 1Z8.

15  
16 †††Corresponding Author: [anna.hargreaves@mcgill.ca](mailto:anna.hargreaves@mcgill.ca); 514 398 7401

17  
18 **Keywords:** species distributions, range limits, wildlife conservation, cold-edge populations,  
19 endangered species, botanical diversity

21 ABSTRACT

22 High-latitude countries tend to contain the polar range-edge of many species that are nationally  
23 rare but globally common. This can focus national conservation efforts toward range-edge  
24 populations, whose conservation needs and value are disputed. Using plants in Canada as a case  
25 study, we ask whether national species-conservation rankings prioritize range-edge populations,  
26 and whether conservation priority is matched by habitat protection and research effort. We found  
27 that >75% of federally-protected plants only occur in Canada peripherally, at the northernmost  
28 20% or less of their total range, and that the most imperilled taxa had the smallest percentage of  
29 their range in Canada (endangered plants: median=1.0%). Occurring peripherally in Canada was  
30 associated with higher threat even after accounting for range area, potentially because range-  
31 edge taxa experienced 85% higher human population densities in their Canadian range than non-  
32 peripheral taxa. High conservation priority was not matched by habitat protection, as more  
33 imperilled and more peripheral taxa had smaller fractions of their Canadian range in protected  
34 areas. Finally, peer-reviewed research on plants at-risk in Canada was low. Only 42% of plants  
35 considered at-risk in Canada had been studied in Canada, and only 11% of species with large  
36 distributions outside Canada had been studied in the context of their wider geographic range—  
37 information that is critical to establishing their relative conservation value. Our results illustrate  
38 that plant conservation in Canada is fundamentally linked to conserving range-edge populations,  
39 yet edge populations themselves are understudied, a research gap we must close to improve  
40 evidence-based conservation.

## 41 INTRODUCTION

42 The conservation value of populations at the edge of a species' distribution is contentious.  
43 Species range edges often coincide with declining suitability and abundance of habitat; about  
44 three quarters of transplant experiments find declines in performance beyond a species' range  
45 (Hargreaves et al. 2014; Lee-Yaw et al. 2016). Edge populations in poor-quality or isolated  
46 habitat are, therefore, predicted to be small (Hengeveld and Haack 1982; Brown et al. 1996),  
47 eroding their genetic quality through genetic drift (Ellstrand and Elam 2003). Small population  
48 size and low genetic quality can make edge populations less important to species' persistence  
49 and harder to conserve (Bunnell et al. 2004). However, even dramatically reduced performance  
50 beyond the range does not necessarily mean that habitat at the range edge is low quality  
51 (Hargreaves and Eckert 2019), and while some edge populations are smaller, less genetically  
52 diverse, or more inbred than core populations (Sexton et al. 2011), these patterns are far from  
53 universal (Villellas et al. 2013; Pironon et al. 2015, 2017; de Medeiros et al. 2018).

54  
55 Indeed, range-edge populations may be particularly valuable for species' long-term success  
56 either genetically or geographically. For widespread species, range edges often include extreme  
57 or unusual habitats (Thakur et al. 2018); if edge populations are locally adapted, they may  
58 contribute uniquely to species' overall genetic diversity (Bunnell et al. 2004; Sexton et al. 2011).  
59 For species whose ranges have expanded and contracted with glacial cycles, populations at the  
60 equatorial range edge may harbour disproportionate genetic diversity that could be critical for  
61 long-term persistence (Hampe and Petit 2005). Finally, while many taxa are shifting to higher  
62 elevations and latitudes in response to climate warming (Chen et al. 2011; Freeman et al. 2018),  
63 warming is expected to outpace dispersal ability for 11% of species globally (Thomas et al.

64 2004). Cool-edge populations are geographically poised to initiate range shifts (Gibson et al.  
65 2009), and may have evolved higher dispersal abilities due to past expansions or demographic  
66 instability (Phillips et al. 2010; Hargreaves et al. 2015), making them invaluable for successful  
67 range shifts.

68  
69 The conservation value of range-edge populations is especially germane when conservation  
70 policy prioritizes (or deprioritizes) them implicitly or explicitly. Many political jurisdictions rank  
71 species by local conservation need, e.g., national, state, or provincial Red Lists. As political  
72 borders rarely follow biogeographic boundaries, jurisdictions may contain range-edge  
73 populations of species widely distributed outside their borders (hereafter 'peripheral taxa'; Hunter  
74 and Hutchinson 1994). For example, most US states contain >20 peripheral reptiles or  
75 amphibians, but many explicitly deprioritize peripheral species in conservation listings,  
76 sometimes jeopardizing species' overall persistence (Steen and Barrett 2015). Conversely,  
77 peripheral taxa may be implicitly prioritized; all else being equal they will occupy less area in a  
78 jurisdiction, making them more likely to be locally rare and deemed 'at-risk' (Lesica and  
79 Allendorf 1995; Glass et al. 2017). In jurisdictions with local endemism, local conservation  
80 rankings can show considerable mismatch from global conservation priorities. For example,  
81 >75% of Finland's rare beetles (Komonen 2007) and >70% of Canada's at-risk flora and fauna  
82 (Gibson et al. 2009; Cameron and Hargreaves 2020) have wide distributions south of these  
83 countries' borders.

84  
85 For jurisdictions with many peripheral populations, resolving their conservation value is highly  
86 relevant to effective conservation policy, but may require direct study of edge populations

87 themselves. Range position does not consistently predict population size, genetic diversity, or  
88 demographic stability (Eckert et al. 2008; Pironon et al. 2017), and the extent of local adaptation  
89 to range-edge conditions can be hard to identify without large experiments (Sexton et al. 2011;  
90 Hargreaves and Eckert 2019; Anderson & Wadgymar 2020). However, earlier syntheses suggest  
91 range edges are under-studied compared to core populations (Eckert et al. 2008; Sexton et al.  
92 2009), potentially impeding evidence-based conservation.

93

94 An excellent case study for exploring ‘peripherality’ (the extent to which a species occurs in a  
95 jurisdiction at the edge of its range) in conservation is Canada. Canada is the world’s second  
96 largest country, spanning almost 10 million km<sup>2</sup> and >41° of latitude—as much latitude as  
97 separates Canada from the Equator—and contains the northernmost potential land for species in  
98 the Americas. Canada’s biodiversity is clustered at its southern border (Cristine et al. 2018), as  
99 is Canada’s human population, potentially increasing threats to range-edge taxa and creating  
100 conflicts between conservation and economic development. Previous estimates suggest ~75% of  
101 terrestrial taxa designated nationally at-risk only occur in Canada at their northern range edge  
102 (Yakimowski and Eckert 2007; Gibson et al. 2009), but this has not been formally quantified.  
103 Finally, risk-assessments are publicly available for all taxa assessed for federal protection (by the  
104 Committee on the Status of Endangered Wildlife in Canada, COSEWIC) and generally include a  
105 detailed range map.

106

107 We test the relationships between peripherality and: range area in Canada; conservation priority  
108 in Canada; conservation risk (human population density) and habitat protection (protected areas);  
109 and peer-reviewed conservation research effort. We use vascular plants as they are relatively

110 diverse (3600 species in Canada compared to ~150 mammals), are of high conservation value  
111 globally, and often receive disproportionately little conservation funding (Raven 1987;  
112 Schemske et al. 1994). Using COSEWIC risk assessments and range maps (Fig. 1),  
113 complemented by NatureServe risk rankings, human population censuses, and literature searches,  
114 we address five key questions. *Q1*) Do Canadian and global threat rankings differ more for taxa  
115 that are peripheral in Canada vs. those that are not, as expected if peripheral taxa have smaller  
116 ranges or populations in Canada or face greater threats (see below)? *Q2*) Do more nationally-  
117 imperilled taxa have smaller ranges in Canada or smaller proportions of their total range in  
118 Canada (i.e. more peripheral), as expected if small ranges and increased peripherality are  
119 associated with conservation risk? *Q3*) Do taxa that occur more peripherally in Canada  
120 experience higher human population density in their Canadian range, potentially explaining an  
121 association between peripherality and conservation risk? *Q4*) Do more-imperilled or more  
122 peripheral taxa have a greater proportion of their range in protected areas, potentially indicating  
123 active conservation effort? *Q5*) Is conservation research effort evenly spread between range-edge  
124 taxa (<20% of their total range in Canada) and non-edge taxa, and how might range-wide studies  
125 inform conservation?

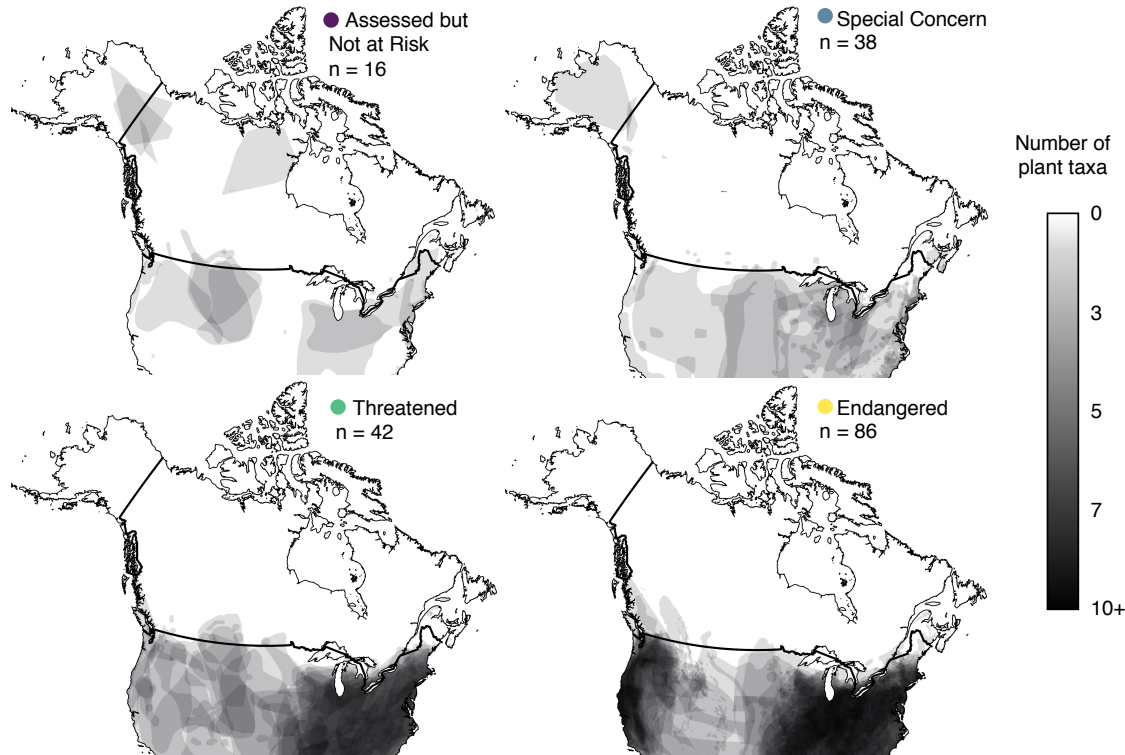

126

127 **Figure 1.** Most plant taxa assessed for protection in Canada only occur in Canada at their  
128 northern range edge. Maps illustrate the Canadian distributions, digitized from COSEWIC risk  
129 assessments, of 182 of the 220 extant vascular plant taxa assessed from 1977 to 2018, grouped  
130 by their COSEWIC-designated risk status (the remaining 38 taxa did not have digitizeable maps  
131 but estimates of peripherality are similar; *Table 1*). If taxa were assessed more than once we use  
132 the most recent assessment. Most plant taxa in Canada have not been assessed by COSEWIC, so  
133 the *Not at Risk* category does not represent all non-imperilled plants but those that were thought  
134 to be potentially at risk and later deemed secure. Thick black line shows the Canada-USA  
135 border, coloured dots introduce the colour scheme used in subsequent figures.  
136

137 METHODS

138 *Threat status*

139 Flora eligibility for protection under Canada's Species at Risk Act (SARA) is determined by the  
140 COSEWIC Vascular Plant subcommittee using quantitative criteria established by the  
141 International Union for the Conservation of Nature (IUCN). COSEWIC was created in 1977, and  
142 SARA was passed in 2002 (SARA 2002). There are three steps to a COSEWIC recommendation.  
143 1) COSEWIC prioritizes which taxa to assess. In this phase COSEWIC prioritizes taxa likely to  
144 become (globally) extinct (SARA 15.1b). 2) If a taxon is prioritized for assessment, COSEWIC  
145 commissions and then reviews and approves an assessment report using the 'best biological  
146 information' available, including scientific, community, and Aboriginal traditional knowledge  
147 (SARA 2002). 3) COSEWIC uses the report to recommend a status: Special concern (may  
148 become threatened or endangered due to biological constraints and other threats); Threatened  
149 (likely to become endangered if threats not mitigated); Endangered (facing imminent extirpation  
150 or extinction), Extirpated, Extinct, or Data deficient (we do not consider Extirpated, Extinct, or  
151 Data deficient taxa as they have no current Canadian range or reliable range map); or Not at risk  
152 (no imminent risk of extirpation or extinction). COSEWIC determines a status considering only  
153 Canadian populations, then reviews whether adjustments are warranted given the likelihood of  
154 demographic rescue from populations outside Canada (Environment and Climate Change Canada  
155 2017). The final decision to protect taxa under SARA rests with the federal government after  
156 considering the socioeconomic implications of COSEWIC's recommendation (SARA 2002). We  
157 therefore use COSEWIC rather than SARA designations as they more closely reflect biology.

158



159 As of August 2018, COSEWIC assessment reports were available for 220 plant populations (1  
160 report each, most available on line but some obtained from COSEWIC directly; sample size  
161 details in Table 1). If the taxon had been reassessed we used the most recent assessment. A few  
162 taxa had reports for two geographically distinct populations (‘designatable units’ in COSEWIC  
163 terminology). If both populations had the same threat status we combined them, otherwise we  
164 excluded the taxon as it was unclear how to calculate a corresponding global range per  
165 population (Table 1). We excluded reports without range maps or descriptions from which we  
166 could estimate the proportion of each range in Canada, yielding 209 taxa including species and  
167 subspecies (Table 1). We recorded each taxon’s COSEWIC threat status: Special concern,  
168 Threatened, Endangered, or Not at risk; the first three categories are considered ‘at-risk’.  
169 COSEWIC only assesses taxa that might be imperilled. The ‘Not at risk’ category does not  
170 reflect all plants that are secure in Canada, but a group of taxa deemed potentially at risk  
171 (therefore worth assessing) but ultimately secure (e.g., not in sufficient decline for listing,  
172 reassessment revealed other populations, taxon not a true taxonomic unit).

173

174 **Table 1.** Sample sizes, with data used for each Question in bold. At-risk taxa are those  
 175 considered Special concern, Threatened, or Endangered, and can have any proportion of their  
 176 range in Canada. Peripheral taxa include at-risk and not-at-risk taxa. ‘At-risk’ and ‘Peripheral’  
 177 columns give the number of populations or taxa and the percentage of the total (i.e. divided by  
 178 column 2). Analyses for Q2–4 use a continuous measure of peripherality only available for  
 179 species with digitized range maps. Analyses for Q1 and Q5 define peripherality categorically and  
 180 so include a larger data set: main analyses use a 20% cut off (species with <20% of their global  
 181 range in Canada = peripheral), and include taxa with digitized maps and taxa for whom we could  
 182 estimate peripherality (Y/N) from range descriptions. Using only taxa with digitized maps and a  
 183 10% cut-off yielded consistent results (Supp Info).

|                                                                | Extant plants in Canada |                      |                           |                           | Question   |
|----------------------------------------------------------------|-------------------------|----------------------|---------------------------|---------------------------|------------|
|                                                                | Total                   | At-risk<br>(COSEWIC) | Peripheral                |                           |            |
|                                                                |                         |                      | 20%<br>cut-off            | 10%<br>cut-off            |            |
| (a) populations with a<br>COSEWIC status                       | 220                     | 197<br>(90%)         | –                         | –                         | –          |
| (b) taxa with COSEWIC report<br>and range map <sup>1</sup>     | 209                     | <b>189</b><br>(90%)  | 165<br>(79%) <sup>2</sup> | –                         | Q5         |
| (c) taxa in (b) with NatureServe<br>ranks for world and Canada | <b>202</b>              | 186<br>(92%)         | 159<br>(79%) <sup>2</sup> | –                         | Q1         |
| (d) taxa in (b) with digitizeable<br>range map                 | <b>182</b>              | 166<br>(91%)         | 141<br>(77%) <sup>3</sup> | 127<br>(70%) <sup>3</sup> | Q2, Q3, Q4 |

- 184 1. From (a), (b) excludes 2 taxa with no available COSEWIC report (*Hackelia ciliata*,  
 185 *Symphotrichum sericeum*), 2 taxa whose COSEWIC report has no map (*Carex nebrascensis*,  
 186 *Pedicularis furbishia*), and 6 populations from 3 taxa where 2 designatable units (populations)  
 187 had different COSEWIC statuses (*Eleocharis geniculata*, *Psilocarphus brevissimus*, *Solidago*  
 188 *speciosa*). *Smilax rotundifolia* had 2 populations assessed with the same COSEWIC status;  
 189 these have been merged into 1 taxon.
- 190 2. For 27 taxa whose distributions could not be digitized (b minus d), we estimated whether they  
 191 were peripheral in Canada (20% cut-off) based on undigitizeable maps and range descriptions.  
 192 We did not do this for the 10% cut-off as it was harder to determine reliably.
- 193 3. 27 taxa maps could not be digitized as they did not show the complete range (19), or were in a  
 194 projection that could not be digitized (4) or were otherwise unclear (4).
- 195

196 For each taxon with a COSEWIC range map, we compiled Canadian and global threat rankings  
 197 from NatureServe (i.e. ‘rounded global status’; NatureServe 2018). NatureServe ranks use

198 consistent criteria so national and global rankings are directly comparable (a detailed comparison  
199 with COSEWIC statuses is in Supp Info Fig. S1). Ranks range from 1 (most threatened) to 5  
200 (least threatened; NatureServe 2018). NatureServe Canadian or global ranks were missing for  
201 seven species, so  $n = 202$  taxa (Table 1). We calculated the ‘rank disparity’ for each taxon as  
202 ‘Global rank – Canadian rank’.

### 203 *Range maps & area*

204 Of the 209 COSEWIC range maps, we were able to digitize 182 using the geographic  
205 information software *Quantum GIS 2.18* (QGIS Development Team 2018; Fig 1). We  
206 georeferenced maps using  $\geq 10$  dispersed coordinates of obvious landmarks, such as country,  
207 province, county or water-body boundaries. All maps underwent a thin plane spline  
208 transformation to allow local deformation, and to standardize map projections to the World  
209 Geodetic System 1984 projection (WGS 84, EPSG 4326), a standard projection for worldwide  
210 geographic datasets and convenient when working with latitude and longitude coordinates (Tim  
211 Elrick, McGill Geographic Information Centre administrator; personal communication).  
212 COSEWIC provided maps as polygons (160 taxa) or points occurrences (29 taxa). For polygon  
213 maps, we traced digital polygons by hand, and for point occurrence maps, we generated a convex  
214 polygon including all points (generally equivalent to COSEWIC’s ‘extent of occupancy’). If we  
215 were unable to generate a convex polygon ( $< 4$  points on the map;  $n = 2$  taxa), we generated a 1  
216 km buffer around each point creating distinct polygons. We could not digitize maps for 27 taxa  
217 whose maps were incomplete or imprecise (as noted by COSEWIC or if mapped as presence  
218 /absence by province) or used a projection that did not allow for proper digitization (e.g.,  
219 circumpolar projection; Table 1).

220

221 For each taxon with a range map, we estimated the proportion of its range in Canada. For 182  
222 taxa with a digitized map, we calculated *a*) global range area (km<sup>2</sup>), *b*) Canadian range area  
223 (km<sup>2</sup>), *c*) proportion range in Canada ( $b \div a$ ) as a quantitative measure of peripherality. For area  
224 calculations, we projected individual shapefiles in QGIS, using the World Mollweide equal-area  
225 projection (WGS 84, EPSG 54 009) since some taxa had large ranges encompassing lower  
226 latitudes such as Mexico (Usery and Seong 2000). Range area was extracted with the *gArea*  
227 function in the “rgeos” package (version 0.4-1; Bivand and Rundel 2018) in R version 3.2.2. (R  
228 Core Team 2017).

229  
230 For all 209 taxa with COSEWIC range maps, we also assigned a categorical designation of  
231 peripherality to simplify analyses comparing national vs. global threat rank and research effort  
232 (Questions 1 & 5). We designated taxa as peripheral if they had <20% of their total range in  
233 Canada, otherwise not. Any threshold is arbitrary; we chose 20% as all 27 taxa whose map could  
234 not be digitized could still be unambiguously categorized as peripheral or not (i.e. clearly had  
235 <20% or >20% of their range in Canada) from maps and range descriptions provided in  
236 COSEWIC assessments and recovery plans. To test the sensitivity of results we ran two  
237 supplementary analyses. First, we re-ran analyses using only taxa with digitized range maps  
238 (Table 1d). Second, we used a more conservative cut-off of 10% (Table 1d), the cut-off used by  
239 COSEWIC to define their lowest level of Canadian responsibility (Environment and Climate  
240 Change Canada 2017).

#### 241 *Covariates*

242 For taxa with digitized range maps ( $n = 182$ ), we calculated two covariates. First, we estimated  
243 the human population density in each taxon’s Canadian range using the dissemination blocks

244 from the 2016 Canadian census (Statistics Canada 2016). Dissemination blocks are the smallest  
245 geographic units used by Statistics Canada (equivalent to a city block bounded by intersecting  
246 streets, with block size determined by road density), for which inhabitants/block data are  
247 available (Statistics Canada 2011). Using *QGIS 2.18* (QGIS Development Team 2018), we  
248 overlaid each taxon's Canadian range polygon on the dissemination block map (McKie 2016). In  
249 R, we then summed the inhabitants across all blocks and partial blocks within each species  
250 range, and then divided this sum by the taxon's Canadian range area to estimate human  
251 population density.

252  
253 Second, we calculated the officially protected area within each taxon's Canadian range using two  
254 protected area databases. The Canadian Council on Ecological Areas database includes all levels  
255 of protected area (e.g., municipal, provincial, federal) in all Canadian provinces and territories  
256 except the province of Quebec (CCEA 2016). Quebec's 'Ministère du Développement Durable  
257 Environnement et Lutte contre les Changements Climatiques' database maps all protected areas  
258 in Quebec (MDEL 2016). We projected the protected area shapefiles to the World Mollweide  
259 equal-area projection (WGS4 EPSG 54 009), then overlaid them on each species' Canadian  
260 range polygon to generate a geographic file of protected habitat. We then calculated the area  
261 (km<sup>2</sup>) of protected habitat in each range polygon in R.

### 262 *Literature search for peer-reviewed studies on at-risk plants*

263 To assess the peer-reviewed research effort on plants deemed at-risk in Canada, we searched  
264 Web of Science for studies on each at-risk taxon with a COSEWIC range map (Table 1b) using  
265 its scientific name, English common name, and synonyms listed in its COSEWIC assessment (up  
266 to August 2017). We searched all taxa at the species level since few studies were available at

267 lower taxonomic designations ( $n = 209$  at-risk species). We narrowed results to ecological or  
268 evolutionary studies by including the search term “\*ecolog\* OR evolution\* OR population\* OR  
269 demograph\* OR genetic\* OR conservation\* OR fitness”. We discarded studies that did not  
270 present data on the taxon of interest (e.g., only mentioned it in key words), yielding >2900  
271 studies.

272  
273 We assessed the conservation and geographic relevance of the resulting studies. Studies were  
274 deemed conservation relevant if they contained data on natural populations that would be  
275 potential use to COSEWIC (e.g., population censuses, performance, life-history, local  
276 adaptation, genetic diversity). Studies that contained no data on natural plant populations or data  
277 that was not relevant to their conservation (e.g., how much a plant species contributed to a  
278 herbivore’s diet) were not considered further. We further classified whether each relevant study  
279 sampled wild Canadian populations, wild populations in the USA, both (providing a wider  
280 geographic context for at-risk Canadian populations), or neither (sampled populations outside  
281 Canada/USA or no specific population). Studies that investigated more than one at-risk taxon (32  
282 studies) were counted for each taxon included.

### 283 *Analyses*

284 *Q1) Do Canadian & global NatureServe ranks differ more for peripheral vs. non-peripheral*  
285 *taxa?*

286 Taxa cannot be less threatened (i.e. more secure) nationally than they are globally, so we are not  
287 testing whether a disparity exists or the direction of the disparity, but whether the disparity is  
288 bigger for peripheral vs. non-peripheral taxa. Threat-rank disparity (NatureServe Global rank –

289 NatureServe Canadian rank) is numeric but only ranges from 0 (i.e. no difference) to 4 (i.e. taxon  
290 ranked as 5 (least threatened) globally and 1 (most threatened) in Canada), requiring non-  
291 parametric analyses. We tested whether threat-rank disparity was greater for peripheral vs. non-  
292 peripheral taxa using a non-parametric two-sample Wilcoxon test. We used categorical  
293 peripherality (peripheral if <20% of range in Canada, otherwise not; Table 1c) to match the (lack  
294 of) resolution in the response variable. As detailed above, we tested whether our results were  
295 robust to using a) only taxa with digitized maps, and b) defining peripheral as  $\geq 10\%$  of range in  
296 Canada (Supp Info).

297 *Q2) Do more imperilled taxa have smaller ranges or range proportions in Canada?*

298 We ran one generalized linear model (GLM) for each of three response variables: global range  
299 area, Canadian range area, and percentage of range in Canada. Each model considered  
300 COSEWIC status as a categorical predictor (model structure: response ~ status). We predicted  
301 that global range area would not differ among COSEWIC ranks, but that Canadian range area  
302 and percentage range in Canada would decline with increasing threat. We used negative binomial  
303 error distributions for over-dispersed count data (range area), and quasi-binomial distributions  
304 for over-dispersed proportional data (range %). Here and for all GLMs, we assessed predictor  
305 significance by comparing models with and without the predictor of interest using a likelihood  
306 ratio test compared to a Chi-squared distribution (*anova* function in R). When COSEWIC status  
307 was significant, we assessed which statuses differed using least squared mean contrasts with a  
308 Tukey correction to maintain  $\alpha = 0.05$  (package *lsmeans*, version 2.30-0; Lenth 2016). To  
309 test whether peripherality was associated with increased imperilment even after accounting for  
310 range area, we translated COSEWIC status to integers (1 = Not at risk, 4 = Endangered). We  
311 used this ‘numeric status’ as the response in a quasiPoisson GLM, with Canadian range area and

312 proportion of range in Canada as predictors (numeric COSEWIC status ~ Canadian range area +  
313 proportion range in Canada).

314

315 COSEWIC procedures changed slightly once SARA was passed in 2002. At the suggestion of  
316 people familiar with COSEWIC, we reran all analyses for Q2 including a categorical covariate  
317 for whether taxa were assessed before or after 2002, to see whether results differed (Supp Info).

318

319 *Q3) Do more peripheral and/or imperilled taxa have more people in their Canadian range?*

320 We tested whether human population density (response) varied with the proportion of global  
321 range in Canada (proportional predictor) and among COSEWIC statuses (categorical predictor),  
322 as expected if human population density and peripheral taxa co-occur close to Canada's southern  
323 border (human density ~ status + proportion range in Canada). We used a negative binomial  
324 GLM and assessed significance as for Q2.

325

326 *Q4) Do more peripheral and/or imperilled taxa have more of their Canadian range protected?*

327 We tested whether the proportion of a taxon's Canadian range that overlapped with a protected  
328 area (overdispersed proportional response) varied among COSEWIC statuses (categorical  
329 predictor) and with peripherality (proportional predictor) using a quasibinomial GLM: proportion  
330 Canadian range protected ~ status + proportion range in Canada. Predictor significance was  
331 determined as in Q2, and we extracted the fit lines and 95% confidence intervals for the effect of  
332 peripherality using the *visreg* R package (version 2.4.1, Breheny and Burchett 2017).

333



334 *Q5) Conservation research effort and insights from range-wide studies on at-risk plants*

335 For the 189 plant species at-risk in Canada with quantifiable ranges (Table 1b), we tested  
336 whether peripheral vs. non-peripheral taxa differed in whether or how often they had been  
337 studied in the conservation-relevant literature, both in across their entire range and in Canada  
338 specifically. All four GLMs used categorical peripherality (Y if <20% of global range in Canada)  
339 as a predictor. Response variables were: 1) whether the taxa had been studied anywhere in its  
340 range (binomial response/GLM); 2) the number of studies from anywhere in the range (negative  
341 binomial response/GLM); 3) whether the taxa had been studied in Canada (binomial GLM); 4)  
342 the number of studies that included Canadian populations (negative binomial GLM). The effect  
343 of being peripheral was evaluated using likelihood ratio tests, as in *Q2*.

344

345 For taxa that have a large fraction of their range outside Canada, studies that sample populations  
346 from both Canada and the USA should reveal the most about the relative conservation value of  
347 peripheral populations in Canada. We therefore reduced the data above (189 taxa) to species with  
348 less than half their range in Canada, selected the conservation-relevant studies on these taxa that  
349 included Canadian populations, and read each study carefully to note examples that yield insights  
350 relevant to conservation that could not have been gleaned from smaller-scale sampling.

## 351 RESULTS

352 Of 189 plant taxa considered at-risk in Canada (Table 1b), 152 taxa (80%) occurred in Canada in  
353 less than 20% of their range, of which 151 were at their northern range edge (*Micranthes spicata*  
354 has the eastern tip of its range in Canada, with the rest in Alaska, Fig. 1 top right). Many at-risk  
355 plants occurred only in southern Ontario or British Columbia (68% of 152 peripheral at-risk taxa,

356 19% of 37 non-peripheral taxa; Fig. 1). Thus, these provinces are disproportionately responsible  
357 for conserving at-risk and range-edge plants.

358

359 *Q1) Do Canadian & global NatureServe ranks differ more for peripheral vs. non-peripheral*  
360 *taxa?*

361 As predicted, the disparity between NatureServe's Canadian and global ranks was greater for  
362 taxa that are peripheral in Canada compared to taxa that are not (Wilcoxon test,  $W = 5878$ ,  $P <$   
363  $0.0001$ ,  $n = 202$ ; Fig. 2). Of the 198 plant taxa that NatureServe considered at-risk (ranks 1 to 3)  
364 in Canada, 67% were considered secure (ranks 4 or 5) across their global range; most of these  
365 nationally-at-risk but globally-secure taxa are peripheral in Canada (123 peripheral, 10 non-  
366 peripheral; Fig. 2). Results were consistent using COSEWIC vs. NatureServe Canadian ranks  
367 (Fig. S1), or using only taxa with digitized maps and a 10% vs 20% threshold for peripherality  
368 (Table S1).

369

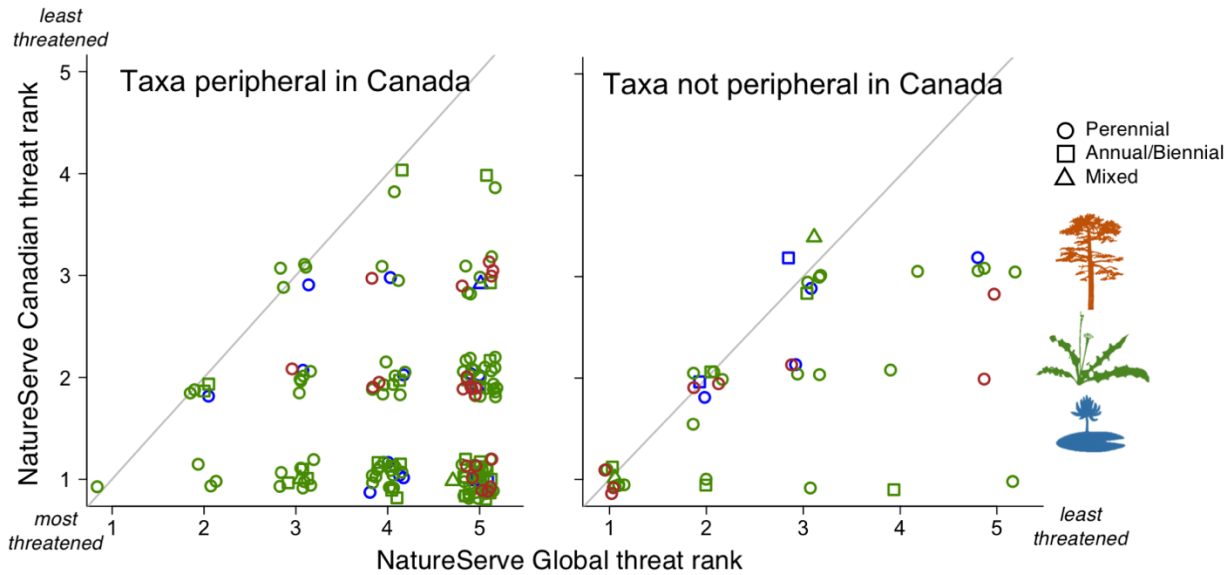

370

371

372 **Figure 2. Disparity between Canadian and global threat ranks is greater for peripheral**  
 373 **species.** (Results for *Question 1*). Diagonal lines indicate Canadian populations have the same  
 374 threat ranking as the species does globally (values above the line are not possible; points are  
 375 jittered for visualization). Taxa with <20% of their range in Canada (left,  $n = 159$ ) have a greater  
 376 mismatch between their Canadian and global threat ranks (more taxa listed as threatened in  
 377 Canada but secure globally) than taxa with >20% of their range in Canada (right,  $n = 43$ ). Point  
 378 shape indicates lifespan; colour indicates growth form and habitat (brown = woody shrub or tree,  
 379 green = non-woody terrestrial plant, blue = aquatic plant). Sample sizes details in Table 1c.

380

381 *Q2) Do more imperilled taxa have smaller ranges or range percentages in Canada?*

382 Plants considered at-risk by COSEWIC (status = Special Concern, Threatened, or Endangered)

383 generally had large global distributions (median = 390,521 km<sup>2</sup>), with much smaller ranges in

384 Canada (median = 4,598 km<sup>2</sup>) that were clustered toward Canada's southern border (Fig. 1). At-

385 risk taxa had a median of 1.8% of their global range in Canada. As predicted, global range size

386 did not differ among Canadian status categories ( $\chi^2_{df3} = 7.5, P = 0.057$ ; Fig. 3a). However, taxa

387 assessed and deemed at-risk had significantly smaller Canadian ranges than taxa assessed and

388 deemed Not-at-risk taxa ( $\chi^2_{df3} = 40.7, P < 0.0001$ ; Fig. 3b), and the most imperilled taxa had the

389 smallest percentages of their range in Canada ( $\chi^2_{df3} = 15.0, P = 0.0002$ ; Fig. 3c). Results did not  
390 differ between taxa assessed before or after SARA was passed (Table S2).

391

392 The extent to which taxa occurred in Canada at the edge of their range was associated with  
393 increased conservation threat, even after accounting for absolute range area in Canada. Numeric  
394 COSEWIC status increased (i.e. more imperilled) as range size in Canada decreased ( $\chi^2_{df1} = 8.8,$   
395  $P = 0.003$ ) and as range percentage in Canada decreased ( $\chi^2_{df1} = 16.9, P < 0.001$ ; Fig. S3).

396

397

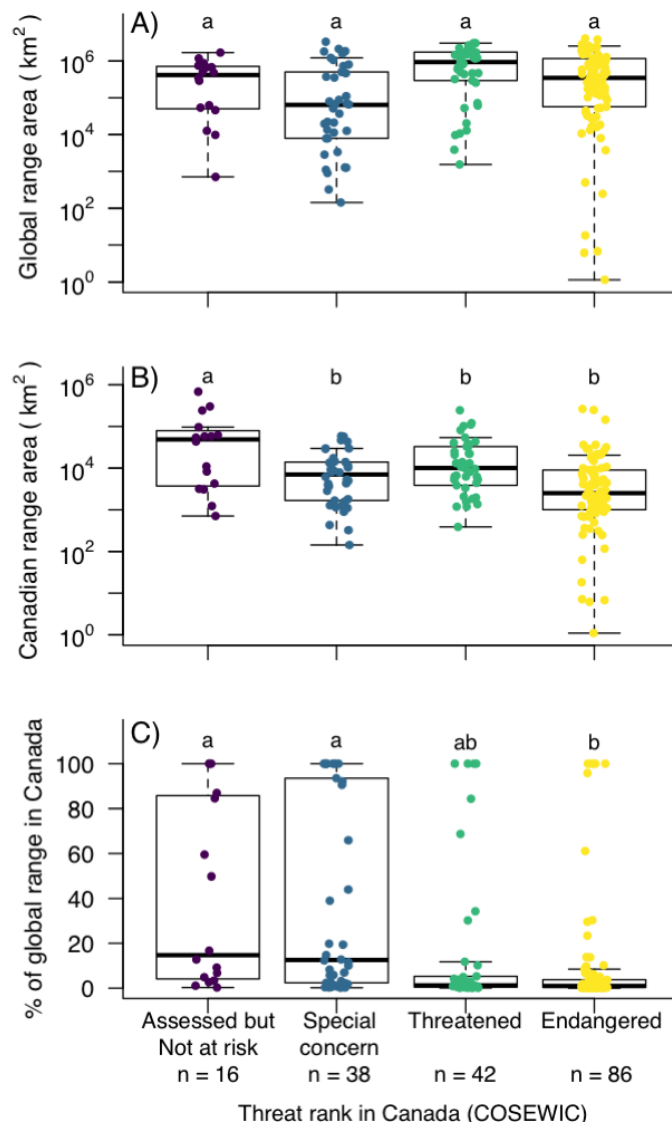

398  
399

400 **Figure 3. Global vs. Canadian range size for plants assessed for protection in Canada.**  
401 (Results for *Question 2*). Differing letters indicate significant differences among COSEWIC  
402 threat statuses within panels. The *Not at Risk* status does not represent all non-threatened plants  
403 but those that were thought to be potentially at risk but later deemed secure. The lower, middle  
404 and upper horizontal lines in each boxplot indicate the 25<sup>th</sup> percentile, the median and the 75<sup>th</sup>  
405 percentile, respectively. Whiskers extend 1.58 interquartile range / square root *n* from the median  
406 or to the extreme points, whichever is less. Coloured points show raw data (horizontal jitter to  
407 facilitate visualization of overlapping points); sample sizes in Table 1d.  
408

409 *Q3) Do more peripheral and/or imperilled taxa have more people in their Canadian range?*  
410 Human population density differed with threat status, but not with peripherality. More imperilled  
411 plants had significantly higher human population densities in their Canadian ranges compared to  
412 taxa assessed at lower threat ranks ( $\chi^2_{df3} = 36.7, P < 0.0001$ ; Fig. 4). After accounting for  
413 differences among threat ranks, taxa that are more peripheral in Canada did not have higher  
414 human densities within their Canadian range ( $\chi^2_{df1} = 1.7, P = 0.20$ ).

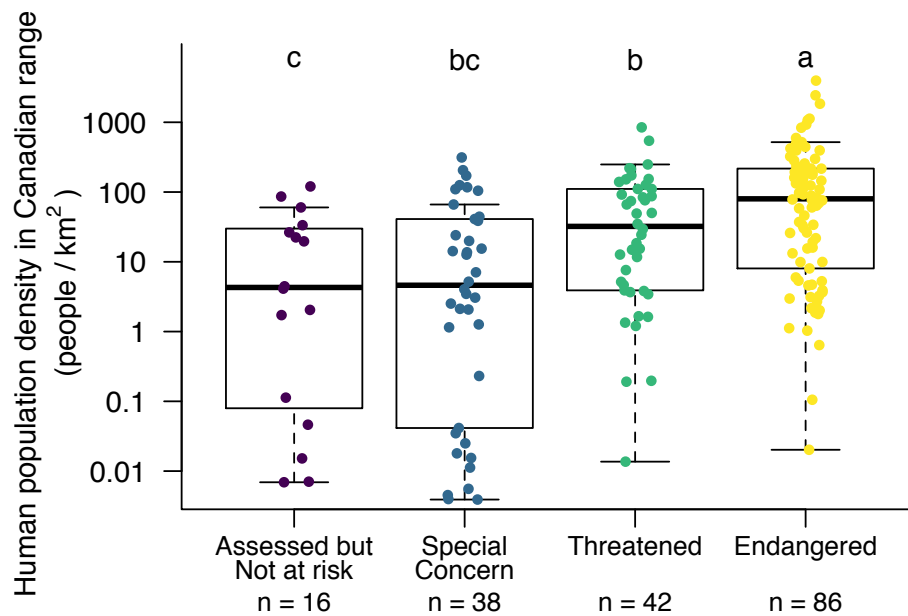

415  
416 **Figure 4. Human population density varied among COSEWIC threat statuses.** (Results for  
417 *Question 3*). Boxplots are as in Fig. 3. Sample size details in Table 1d.  
418

419 *Q4) Do more peripheral and/or imperilled taxa have more of their Canadian range protected?*  
420 Plant taxa considered at-risk in Canada had only 3.7% (median) of their Canadian range  
421 protected, and only 8 taxa had >50% of their Canadian range protected (Fig. 5). Habitat  
422 protection varied among threat statuses (COSEWIC status:  $\chi^2_{df3} = 15.1, P = 0.0017$ ), but contrary  
423 to predictions the taxa the are the most imperilled in Canada tended to have the lowest fraction of  
424 their Canadian range protected; Fig. 5a). Habitat protection also varied with peripherality

425 (proportion range in Canada:  $\chi^2_{df1} = 37.0, P < 0.001$ ). As predicted, the more peripherally a taxon  
426 occurred in Canada, the smaller the fraction of its Canadian range was protected (Fig. 5b).

427

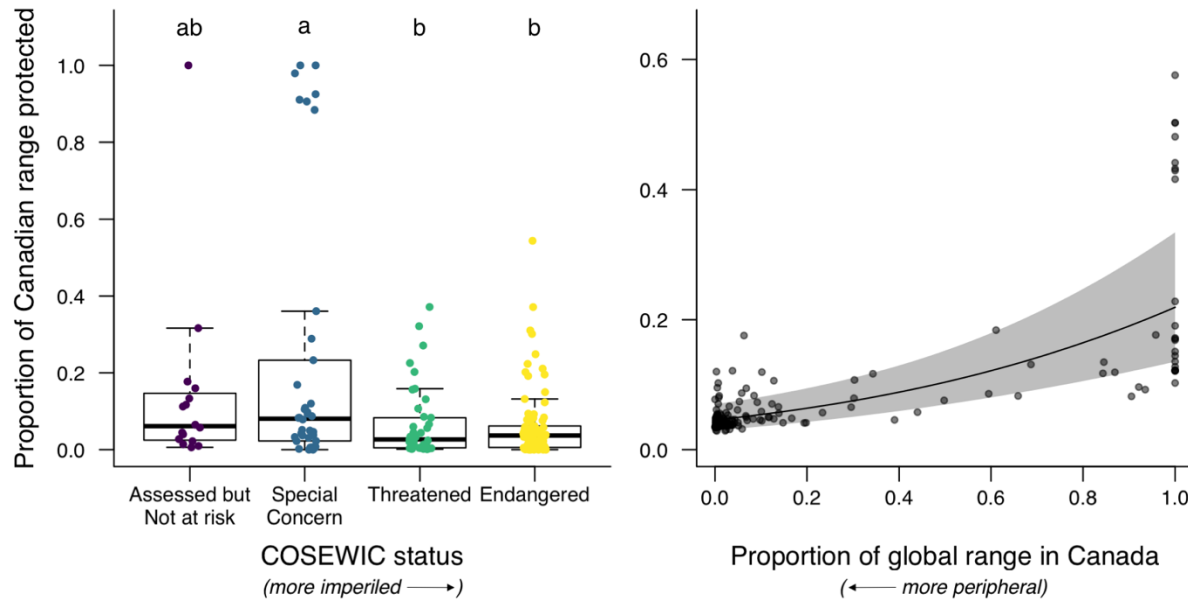

428

429 **Figure 5. Habitat protection varies with threat status and peripherality.** (Results for  
430 *Question 4*). (A) Taxa more imperilled in Canada (threatened, endangered) have the smallest  
431 proportion of their Canadian range protected. Boxplot formatting and  $n$  as in Figs. 2&3. (B) Taxa  
432 with less of their global range in Canada (more peripheral) have smaller proportions of their  
433 Canadian range protected. Line, shading, and points show fit, 95% confidence intervals, and  
434 residuals extracted from the quasi binomial GLM: proportion Canadian range protected  $\sim$   
435 COSEWIC status + proportion range in Canada.

436 *Q5) Conservation research effort and insights from range-wide studies on at-risk plants*

437 Our literature searches yielded 657 peer-reviewed, conservation-relevant studies on the 189 plant  
438 species that are at-risk in Canada and whose geographic distribution we can assess (Table 1b).

439 Almost half (44%) of the 189 species had not been studied in peer-reviewed work that could  
440 inform conservation (Fig. 6a). Though this does not preclude the existence of studies in the non-  
441 refereed literature or journals not indexed on Web of Science, it suggests that the ‘best biological  
442 information’ is sparse for many taxa. Compared to species with more than 20% of their range in  
443 Canada, species that only occur peripherally in Canada did not differ in the likelihood that they  
444 had been studied ( $\chi^2_{df=1} = 1.73, P = 0.19$ ) or in the number of studies ( $\chi^2_{df=1} = 0.21, P = 0.88$ ;  
445 Fig. 6a). Comparisons remained non-significant if we used only taxa with digitized range maps  
446 or 10% peripheral criterion (Table S3).

447  
448 Of 657 conservation-relevant studies, only 187 included Canadian populations. Less than half  
449 (42%) of plant species at-risk in Canada had been studied in Canada (Fig. 6b). Peripheral and  
450 non-peripheral species did not differ in the likelihood that they had been studied in Canada  
451 ( $\chi^2_{df=1} = 0.02, P = 0.90$ ), nor in the number of studies that included Canadian populations ( $\chi^2_{df=1}$   
452  $= 2.72, P = 0.099$ ; Fig. 6b). However, if one considers only taxa with a digitized range map or a  
453 stricter definition of peripheral (<10% range in Canada), peripheral species had fewer studies  
454 that included Canadian populations than non-peripheral species (Table S3).

455



456

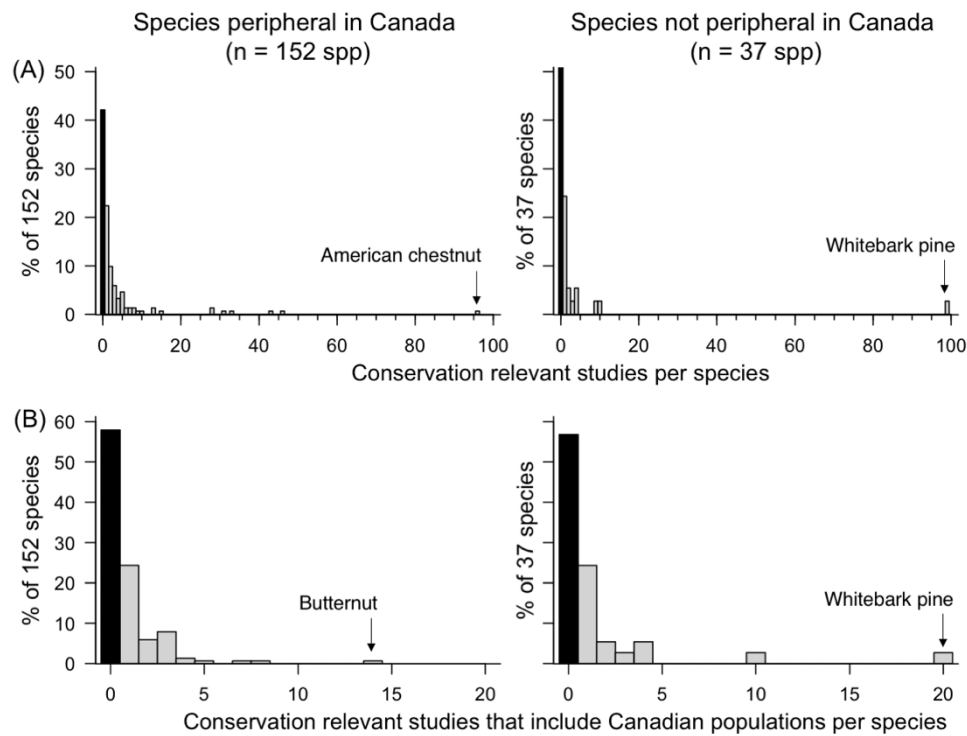

457

458 **Figure 6. Distribution of conservation-relevant research on plants at-risk in Canada.** (A)  
459 distribution of all 657 studies that could inform conservation; (B) 187 studies from (A) that  
460 included data from wild Canadian populations. Left panels = peripheral species (< 20% of range  
461 in Canada); right panels = non-peripheral species. Black bars show species with no peer-  
462 reviewed studies.

463

464 Most (162 of 189) plant species at risk have less than half their range in Canada, such that  
465 understanding Canadian populations in the context of their wider geographic range could inform  
466 conservation. But only 6% (34 of 536) of studies on these species included both Canadian and  
467 USA populations, and these 34 studies covered only 20 (11%) of the 162 species. Studies that  
468 performed range-wide sampling provided unique insights into conserving peripheral populations  
469 (Table 2). These include whether edge populations differ from core populations genetically,  
470 demographically, or in key traits or habitat affinity. For instance, populations of Deerberry  
471 (*Vaccinium stamineum*) decreased in size and frequency toward the species northern range edge

472 in Canada, but were nevertheless as productive and genetically diverse as core populations, and  
473 showed evidence of local adaptation and high dispersal ability (Yakimowski and Eckert 2007,  
474 2008). Thus the demographic and genetic value of these populations was not predicted by their  
475 peripherality, size, or spatial isolation.

476

477 **Table 2.** Studies with wide geographic coverage can shed light on the conservation needs and  
 478 value of peripheral populations. Key findings are taken from studies of plant taxa deemed at-risk  
 479 in Canada that sampled both Canadian and USA populations. All taxa are peripheral in Canada.

**Response**

| Finding for edge populations                                                    | Species                      | Reference                  |
|---------------------------------------------------------------------------------|------------------------------|----------------------------|
| <b>Genetic uniqueness</b>                                                       |                              |                            |
| Genetically differentiated from core populations (neutral variation)            | Branched bartonia            | Ciotir et al. 2013         |
|                                                                                 | Green dragon                 | Boles et al. 2000          |
|                                                                                 | Spalding's Campion           | Lesica et al. 2016         |
| Greatest population differentiation                                             | Butternut                    | Hoban et al. 2010          |
| <b>Genetic diversity</b>                                                        |                              |                            |
| Not lower neutral genetic diversity than core populations                       | Heartleaf plantain           | Mymudes and Les 1993       |
|                                                                                 | Deerberry                    | Yakimowski and Eckert 2008 |
|                                                                                 | Green dragon                 | Boles et al. 2000          |
|                                                                                 | Golden paintbrush            | Godt et al. 2005           |
|                                                                                 | Cucumber tree                | Budd et al. 2015           |
| <b>Population demography</b>                                                    |                              |                            |
| Not smaller than core populations                                               | Golden paintbrush            | Godt et al. 2005           |
| Smaller & more isolated than core populations                                   | Deerberry                    | Yakimowski and Eckert 2007 |
| <b>Performance &amp; ecology</b>                                                |                              |                            |
| Similar habitat to core populations                                             | Small whorled pogonia orchid | Mehrhoff 1989              |
| Lowest seed viability & distinct dormancy patterns                              | Green dragon                 | Yang et al. 1999           |
| Higher seed mass & equal sexual reproduction / productivity as core populations | Deerberry                    | Yakimowski and Eckert 2007 |

480 Branched bartonia = *Bartonia paniculata ssp. paniculata*; Butternut = *Juglans cinerea*;  
 481 Cucumber tree = *Magnolia acuminata*; Deerberry = *Vaccinium stamineum*; Golden paintbrush =  
 482 *Castilleja levisecta*; Green dragon = *Arisaema dracontium*; North American ginseng = *Panax*  
 483 *quinquefolius*; Small whorled pogonia orchid = *Isotria medeoleoides*; Heartleaf plantain =  
 484 *Plantago cordata*; Spalding's campion = *Silene spaldingii*.

485

486 DISCUSSION

487 Our results show that conservation of plants in Canada is fundamentally the conservation of  
488 range-edge populations. Three quarters of nationally at-risk plant taxa only occur in Canada at  
489 the northernmost 20% or less of their global range, in line with earlier estimates for all at-risk  
490 taxa combined (Gibson et al. 2009). We do not have range maps for the thousands of plants in  
491 Canada that have not been assessed by COSEWIC, so cannot directly test whether at-risk plants  
492 are more peripheral than average. However, taxa with <20% of their range in Canada had a  
493 greater disparity between their Canadian vs. global threat ranking than taxa with more of their  
494 range in Canada (Fig. 2), and the most imperilled taxa were significantly more peripheral  
495 (smaller proportion of their range in Canada) than less imperilled taxa (Fig. 2C), suggesting a  
496 real relationship between occurring as range-edge populations and being nationally at-risk.

497

498 Range-edge taxa could be more nationally threatened because they have smaller ranges and  
499 therefore fewer individuals in Canada, or because their Canadian populations are  
500 disproportionately threatened. Our results suggest that both are true. Smaller range area in  
501 Canada was associated with higher COSEWIC threat status (Fig. 3B), but peripherality was  
502 associated with higher threat even after accounting for Canadian range area (Fig. S3).  
503 Endangered taxa are both the most imperilled and most peripheral group (Fig. 3C) and had  
504 significantly higher human population densities in their Canadian range (Fig. 4), although  
505 peripherality was not associated with human density after accounting for threat rank. We did not  
506 test effects of human activity not associated with high population density (e.g., agriculture), but  
507 overall human activity is also highest in southern Canada (Coristine and Kerr 2011), where most-

508 at-risk and almost all peripheral taxa occur (Fig. 1). Thus, higher national threat ranks for  
509 peripheral taxa probably reflect real increased risk per population.

510

511 Stewarding Canada's future biodiversity clearly requires an informed policy on conserving  
512 peripheral populations. Not only are most at-risk flora range-edge populations, but these  
513 populations are geographically poised to initiate northward range shifts under climate warming  
514 (Gibson et al. 2009), and so will make up more of Canada's flora in the future. Unfortunately,  
515 conservation of peripheral taxa has been debated in the absence of much relevant scientific  
516 evidence. Less than half the plant species with at-risk populations in Canada have been studied in  
517 Canada in a way that could guide their conservation. While this could reflect difficulty in  
518 obtaining permits or adequate sample sizes, taxonomic bias is likely. For example, one bird  
519 species that is both peripheral and at-risk in Canada had almost 50 studies that included  
520 Canadian populations (Marbled murrelet; Web of Science search May 2019), far more than any  
521 peripheral at-risk plant species (Fig. 6B).

522

523 The few conservation-relevant studies that include both Canadian and US populations illustrate  
524 the value of studying peripheral populations directly and in a broad geographic context.

525 However, most of these studies have assessed neutral genetic diversity and population structure  
526 (Table 2). Conservation would particularly benefit from studies of characteristics important for  
527 long-term persistence and range expansion, such as habitat preferences, population demography  
528 and dispersal ability (Schemske et al. 1994). Future genetic work could move beyond neutral  
529 variation to evaluating the adaptive diversity likely to be important in responding to  
530 environmental change (Shaw and Etterson 2012), and local adaptation through which range-edge

531 populations may contribute uniquely to species' biodiversity (Yeaman et al. 2016). Whether  
532 researchers will close these knowledge gaps depends partially on how government agencies  
533 incentivise (i.e. fund) and remove barriers to (i.e. permit) research on at-risk peripheral  
534 populations. Unfortunately, the "peripherality issue" is not currently highlighted in federal  
535 programs that fund species-at-risk research in Canada (e.g. Government of Canada 2019).  
536

537 We hope that exposing this research need inspires future work on at-risk edge populations, but  
538 recognize that amassing this work will take time, and that some of the most informative types of  
539 study, e.g., large reciprocal transplants, will be impossible with endangered taxa. In the  
540 meantime, we have a potentially under-used body of research that could inform Canadian  
541 conservation: the already extensive theory and empirical research on species range edges (Sexton  
542 et al. 2009; Pironon et al. 2017). While this research clearly shows that edge populations can  
543 vary significantly from one another in demography (Sagarin et al. 2006) and degree of adaptation  
544 (Hargreaves and Eckert 2019), it also reveals broad scale patterns that can be predictive, e.g., that  
545 poleward range edges are often dispersal limited whereas high-elevation edge populations are  
546 often demographic sinks (Halbritter et al. 2013; Hargreaves et al. 2014), and suggests novel  
547 conservation strategies, e.g., increasing gene-flow among isolated range-edge populations to  
548 spread broadly beneficial alleles (Sexton et al. 2011; Hargreaves and Eckert 2019). For countries  
549 like Canada whose biodiversity is disproportionately comprised of range-edge populations,  
550 leveraging this literature could help meet commitments to protecting current and future  
551 biodiversity.

552

553 ACKNOWLEDGEMENTS

554 We thank Christie Whelan (Dept Fisheries and Oceans), Gary Allen & Mark Major (Parks  
555 Canada), Joanna Freeland (Trent University), Jeanette Whitton (UBC), and Karen Samis  
556 (Queen's U) for providing insight into Canadian conservation policy and practise. We also thank  
557 Tim Elrick (McGill University) for his help with geographical data. Funding was provided by  
558 Natural Sciences and Engineering Research Council of Canada (Discovery grants to ALH and  
559 CGE), by E. Gordon Edwards and Vivian Astroff Science Undergraduate Research Awards to  
560 PC, and by William E. Bembridge Science Undergraduate Research Award to SKN.

561 COMPETING INTERESTS STATEMENT

562 Authors have no competing interests to declare.

563 REFERENCES

- 564 Anderson, J., and Wadgyamar, S. 2020. Climate change disrupts local adaptation and favours  
565 upslope migration. *Ecol. Lett.* **23**(1): 181-192.
- 566 Bivand, R., and Rundel, C. 2018. rgeos: Interface to Geometry Engine - Open Source ('GEOS').  
567 Available from <https://cran.r-project.org/package=rgeos>.
- 568 Boles, R.L., Lovett-Doust, J., and Lovett-Doust, L. 2000. Population genetic structure in green  
569 dragon (*Arisaema dracontium*, Araceae). *Can. J. Bot.* **77**(10): 1401–1410.  
570 doi:10.1139/b99-089.
- 571 Breheny, P., and Burchett, W. 2017. Visualization of Regression Models Using visreg.
- 572 Brito, D., Ambal, R.G., Brooks, T., Silva, N.D., Foster, M., Hao, W., Hilton-Taylor, C., Paglia,  
573 A., Rodríguez, J.P., and Rodríguez, J.V. 2010. How similar are national red lists and the  
574 IUCN Red List? *Biol. Conserv.* **143**(5): 1154–1158. doi:10.1016/j.biocon.2010.02.015.
- 575 Brown, J.H., Stevens, G.C., and Kaufman, D.M. 1996. The geographic range: size, shape, and  
576 internal structure. *Annu. Rev. Ecol. Syst.* **27**: 597–623.  
577 doi:10.1146/annurev.ecolsys.27.1.597.
- 578 Budd, C., Zimmer, E., and Freeland, J.R. 2015. Conservation genetics of *Magnolia acuminata*, an  
579 endangered species in Canada: Can genetic diversity be maintained in fragmented,  
580 peripheral populations? *Conserv. Genet.* **16**(6): 1359–1373. doi:10.1007/s10592-015-  
581 0746-9.
- 582 Bunnell, F.L., Campbell, R.W., and Squires, K.A. 2004. Conservation priorities for peripheral  
583 species: the example of British Columbia. *Can. J. For. Res.* **34**(11): 2240–2247.  
584 doi:10.1139/x04-102.
- 585 Cameron, V., and Hargreaves, A.L. 2020. Spatial distribution and hotspots of mammals in  
586 Canada. bioRxiv: 2020.01.29.925461. doi:10.1101/2020.01.29.925461.
- 587 CCEA. 2016. Conservation Areas Reporting and Tracking System Procedures Manual and  
588 Database Schema Implementation version - 2016. : 43.
- 589 Chen, I.-C., Hill, J.K., Ohlemüller, R., Roy, D.B., and Thomas, C.D. 2011. Rapid range shifts of  
590 species associated with high levels of climate warming. *Science* **333**(6045): 1024–6.  
591 doi:10.1126/science.1206432.
- 592 Ciotir, C., Yesson, C., and Freeland, J. 2013. The evolutionary history and conservation value of  
593 disjunct *Bartonia paniculata* subsp *paniculata* (Branched *Bartonia*) populations in Canada.  
594 *Botany* **91**(9): 605–613. doi:10.1139/cjb-2013-0063.
- 595 Coristine, L.E., Jacob, A.L., Schuster, R., Ford, A., Woodley, S., Shiffman, D.S., Orihel, D.,  
596 Baron, N.E., Bennett, N.J., Venter, O., Bittick, S.J., Favaro, B., Dey, C., Otto, S.P.,  
597 Polfus, J.L., Nowlan, L., and Palen, W.J. 2018. Informing Canada's commitment to  
598 biodiversity conservation: A science-based framework to help guide protected areas  
599 designation through Target 1 and beyond. *Facets* **3**(1): 531–562. doi:10.1139/facets-  
600 2017-0102.
- 601 Coristine, L.E., and Kerr, J.T. 2011. Habitat loss, climate change, and emerging conservation  
602 challenges in Canada. *Can. J. Zool.* **89**(5): 435–451. doi:10.1139/z11-023.
- 603 Eckert, C.G., Samis, K.E., and Loughheed, S.C. 2008. Genetic variation across species'  
604 geographical ranges: the central–marginal hypothesis and beyond. *Mol. Ecol.* **17**(5):  
605 1170–1188. doi:10.1111/j.1365-294X.2007.03659.x.



- 606 Ellstrand, N.C., and Elam, D.R. 2003. Population Genetic Consequences of Small Population  
607 Size: Implications for Plant Conservation. *Annu. Rev. Ecol. Syst.* **24**(1): 217–242.  
608 doi:10.1146/annurev.es.24.110193.001245.
- 609 Environment and Climate Change Canada. 2017. COSEWIC wildlife species assessment:  
610 candidate wildlife species. Available from [www.canada.ca/en/environment-climate-](http://www.canada.ca/en/environment-climate-change/services/committee-status-endangered-wildlife/wildlife-species-assessment-process-categories-guidelines/candidate.html)  
611 [change/services/committee-status-endangered-wildlife/wildlife-species-assessment-](http://www.canada.ca/en/environment-climate-change/services/committee-status-endangered-wildlife/wildlife-species-assessment-process-categories-guidelines/candidate.html)  
612 [process-categories-guidelines/candidate.html](http://www.canada.ca/en/environment-climate-change/services/committee-status-endangered-wildlife/wildlife-species-assessment-process-categories-guidelines/candidate.html) [accessed 18 November 2019].
- 613 Freeman, B.G., Lee-Yaw, J.A., Sunday, J.M., and Hargreaves, A.L. 2018. Expanding, shifting  
614 and shrinking: The impact of global warming on species' elevational distributions. *Glob.*  
615 *Ecol. Biogeogr.* **27**(11): 1268–1276. doi:10.1111/geb.12774.
- 616 Gibson, S.Y., Van der Marel, R.C., and Starzomski, B.M. 2009. Climate change and  
617 conservation of leading-edge peripheral populations. *Conserv. Biol.* **23**(6): 1369–1373.  
618 doi:10.1111/j.1523-1739.2009.01375.x.
- 619 Glass, W.R., Corkum, L.D., and Mandrak, N.E. 2017. Living on the edge: Traits of freshwater  
620 fish species at risk in Canada. *Aquat. Conserv. Mar. Freshw. Ecosyst.* **27**(5): 938–945.  
621 doi:10.1002/aqc.2781.
- 622 Godt, M.J.W., Caplow, F., and Hamrick, J.L. 2005. Allozyme diversity in the federally  
623 threatened golden paintbrush, *Castilleja levisecta* (Scrophulariaceae). *Conserv. Genet.*  
624 **6**(1): 87–99. doi:10.1007/s10592-004-7746-5.
- 625 Government of Canada. 2019. Canada Nature Fund. Available from  
626 <https://www.canada.ca/en/environment-climate-change/services/nature-legacy/fund.html>  
627 [accessed 16 June 2019].
- 628 Halbritter, A.H., Alexander, J.M., Edwards, P.J., and Billeter, R. 2013. How comparable are  
629 species distributions along elevational and latitudinal climate gradients? *Glob. Ecol.*  
630 *Biogeogr.* **22**(11): 1228–1237. doi:10.1111/geb.12066.
- 631 Hampe, A., and Petit, R.J. 2005. Conserving biodiversity under climate change: The rear edge  
632 matters. *Ecol. Lett.* **8**(5): 461–467. doi:10.1111/j.1461-0248.2005.00739.x.
- 633 Hargreaves, A.L., Bailey, S.F., and Laird, R.A. 2015. Fitness declines towards range limits and  
634 local adaptation to climate affect dispersal evolution during climate-induced range shifts.  
635 *J. Evol. Biol.* **28**(8): 1489–1501. doi:10.1111/jeb.12669.
- 636 Hargreaves, A.L., and Eckert, C.G. 2019. Local adaptation primes cold-edge populations for  
637 range expansion but not warming-induced range shifts. *Ecol. Lett.* **22**(1): 78–88.  
638 doi:10.1111/ele.13169.
- 639 Hargreaves, A.L., Samis, K.E., and Eckert, C.G. 2014. Are Species' Range Limits Simply Niche  
640 Limits Writ Large? A Review of Transplant Experiments beyond the Range. *Am. Nat.*  
641 **183**(2): 157–173. The University of Chicago Press/The American Society of Naturalists.  
642 doi:10.1086/674525.
- 643 Hengeveld, R., and Haeck, J. 1982. The distribution of abundance. *J. Biogeogr.* **9**(4): 303–316.
- 644 Hoban, S.M., Borkowski, D.S., Brosi, S.L., McCleary, T.S., Thompson, L.M., McLachlan, J.S.,  
645 Pereira, M.A., Schlarbaum, S.E., and Romero-Severson, J. 2010. Range-wide  
646 distribution of genetic diversity in the North American tree *Juglans cinerea*: a product of  
647 range shifts, not ecological marginality or recent population decline. *Mol. Ecol.* **19**(22):  
648 4876–4891. doi:10.1111/j.1365-294X.2010.04834.x.

- 649 Hunter, M.I., and Hutchinson, A. 1994. The Virtues and Shortcomings of Parochialism:  
650 Conserving Species That Are Locally Rare, but Globally Common. *Conserv. Biol.* **8**(4):  
651 1163–1165.
- 652 Komonen, A. 2007. Are we conserving peripheral populations? An analysis of range structure of  
653 longhorn beetles (Coleoptera: Cerambycidae) in Finland. *J. Insect Conserv.* **11**(3): 281–  
654 285. doi:10.1007/s10841-006-9043-8.
- 655 Lee-Yaw, J.A., Kharouba, H.M., Bontrager, M., Mahony, C., Csörgő, A.M., Noreen, A.M.E., Li,  
656 Q., Schuster, R., and Angert, A.L. 2016. A synthesis of transplant experiments and  
657 ecological niche models suggests that range limits are often niche limits. *Ecol. Lett.*  
658 **19**(6): 710–722. doi:10.1111/ele.12604.
- 659 Lenth, R.V. 2016. Least-Squares Means: The R Package lsmeans. doi:10.18637/jss.v069.i01.
- 660 Lesica, P., Adams, B., and Smith, C.T. 2016. Can physiographic regions substitute for  
661 genetically-determined conservation units? A case study with the threatened plant, *Silene*  
662 *spaldingii*. *Conserv. Genet.* **17**(5): 1041–1054. doi:10.1007/s10592-016-0842-5.
- 663 Lesica, P., and Allendorf, F.W. 1995. When Are Peripheral Populations Valuable for  
664 Conservation? *Conserv. Biol.* **9**(4): 753–760.
- 665 McKie, D. 2016. David McKie | Your home for data journalism. Available from  
666 <http://www.davidmckie.com/> [accessed 22 December 2018].
- 667 MDEL. 2016. Registre des aires protégées au Québec.
- 668 de Medeiros, C.M., Hernández-Lambrano, R.E., Ribeiro, K.A.F., and Sánchez Agudo, J.Á. 2018.  
669 Living on the edge: do central and marginal populations of plants differ in habitat  
670 suitability? *Plant Ecol.* **219**(9): 1029–1043. doi:10.1007/s11258-018-0855-x.
- 671 Mehrhoff, L.A. 1989. Reproductive vigor and environmental factors in populations of an  
672 endangered North American orchid, *Isotria medeoloides* (Pursh) rafinesque. *Biol.*  
673 *Conserv.* **47**(4): 281–296. doi:10.1016/0006-3207(89)90071-2.
- 674 Mymudes, M.S., and Les, D.H. 1993. Morphological and Genetic Variability in *Plantago cordata*  
675 (Plantaginaceae), a Threatened Aquatic Plant. *Am. J. Bot.* **80**(3): 351–359.  
676 doi:10.2307/2445359.
- 677 NatureServe. 2018. NatureServe Explorer: NatureServe Conservation Status. Available from  
678 <http://explorer.natureserve.org/ranking.htm> [accessed 17 November 2019].
- 679 Phillips, B.L., Brown, G.P., and Shine, R. 2010. Evolutionarily accelerated invasions: The rate of  
680 dispersal evolves upwards during the range advance of cane toads. *J. Evol. Biol.* **23**(12):  
681 2595–2601. doi:10.1111/j.1420-9101.2010.02118.x.
- 682 Pironon, S., Papuga, G., Vilellas, J., Angert, A.L., García, M.B., and Thompson, J.D. 2017.  
683 Geographic variation in genetic and demographic performance: new insights from an old  
684 biogeographical paradigm. *Biol. Rev.* **92**(4): 1877–1909. doi:10.1111/brv.12313.
- 685 Pironon, S., Vilellas, J., Morris, W.F., Doak, D.F., and García, M.B. 2015. Do geographic,  
686 climatic or historical ranges differentiate the performance of central versus peripheral  
687 populations? *Glob. Ecol. Biogeogr.* **24**(6): 611–620. doi:10.1111/geb.12263.
- 688 QGIS Development Team. 2018. QGIS Geographic Information System. Available from  
689 <http://qgis.osgeo.org>.
- 690 R Core Team. 2017. R: A language and environment for statistical computing. Vienna. Available  
691 from <https://www.r-project.org/>.

- 692 Raven, P. 1987. Scope of the plant conservation problem world-wide in Bramwell D, editor. *In*  
693 *Proceedings of an International Conference on botanic gardens and the world*  
694 *conservation strategy*. London: Academic Press., Las Palmas de Gran Canaria.
- 695 Sagarin, R.D., Gaines, S.D., and Gaylord, B. 2006. Moving beyond assumptions to understand  
696 abundance distributions across the ranges of species. *Trends Ecol. Evol.* **21**(9): 524–530.  
697 doi:10.1016/j.tree.2006.06.008.
- 698 SARA. 2002. Species at Risk Act.
- 699 Schemske, D.W., Husband, B.C., Ruckelshaus, M.H., Goodwillie, C., Parker, I.M., and Bishop,  
700 J.G. 1994. Evaluating approaches to the conservation of rare and endangered plants.  
701 *Ecology* **75**(3): 584–606.
- 702 Sexton, J.P., McIntyre, P.J., Angert, A.L., and Rice, K.J. 2009. Evolution and Ecology of Species  
703 Range Limits. *Annu. Rev. Ecol. Evol. Syst.* **40**(1): 415–436.  
704 doi:10.1146/annurev.ecolsys.110308.120317.
- 705 Sexton, J.P., Strauss, S.Y., and Rice, K.J. 2011. Gene flow increases fitness at the warm edge of  
706 a species' range. *Proc. Natl. Acad. Sci.* **108**(28): 11704–11709.  
707 doi:10.1073/pnas.1100404108.
- 708 Shaw, R.G., and Etterson, J.R. 2012. Rapid climate change and the rate of adaptation: insight  
709 from experimental quantitative genetics. *New Phytol.* **195**(4): 752–765.  
710 doi:10.1111/j.1469-8137.2012.04230.x.
- 711 Statistics Canada. 2011. Census Dictionary.
- 712 Statistics Canada. 2016. Geographic Attribute File, Reference Guide.
- 713 Steen, D.A., and Barrett, K. 2015. Should states in the USA value species at the edge of their  
714 geographic range? *J. Wildl. Manag.* **79**(6): 872–876. doi:10.1002/jwmg.897.
- 715 Thakur, M., Schättin, E.W., and McShea, W.J. 2018. Globally common, locally rare: revisiting  
716 disregarded genetic diversity for conservation planning of widespread species. *Biodivers.*  
717 *Conserv.* **27**(11): 1–5. doi:10.1007/s10531-018-1579-x.
- 718 Thomas, C.D., Cameron, A., Green, R.E., Bakkenes, M., Beaumont, L.J., Collingham, Y.C.,  
719 Erasmus, B.F.N., de Siqueira, M.F., Grainger, A., Hannah, L., Hughes, L., Huntley, B.,  
720 van Jaarsveld, A.S., Midgley, G.F., Miles, L., Ortega-Huerta, M.A., Townsend Peterson,  
721 A., Phillips, O.L., and Williams, S.E. 2004. Extinction risk from climate change. *Nature*  
722 **427**(6970): 145–148. doi:10.1038/nature02121.
- 723 Usery, E.L., and Seong, J.-C. 2000. A Comparison of Equal-Area Map Projections for Regional  
724 and Global Raster Data. PhD Thesis. Available from [http://carto-](http://carto-research.er.usgs.gov/projection/pdf/nmdrs.usery.prn.pdf)  
725 [research.er.usgs.gov/projection/pdf/nmdrs.usery.prn.pdf](http://carto-research.er.usgs.gov/projection/pdf/nmdrs.usery.prn.pdf).
- 726 Villellas, J., Morris, W.F., and Garcia, M.B. 2013. Variation in stochastic demography between  
727 and within central and peripheral regions in a widespread short-lived herb. *Ecology*  
728 **94**(6): 1378–1388. doi:10.1890/12-1163.1.
- 729 Yakimowski, S.B., and Eckert, C.G. 2007. Threatened peripheral populations in context:  
730 Geographical variation in population frequency and size and sexual reproduction in a  
731 clonal woody shrub. *Conserv. Biol.* **21**(3): 811–822. doi:10.1111/j.1523-  
732 1739.2007.00684.x.
- 733 Yakimowski, S.B., and Eckert, C.G. 2008. Populations do not become less genetically diverse or  
734 more differentiated towards the northern limit of the geographical range in clonal  
735 *Vaccinium stamineum* (Ericaceae). *New Phytol.* **180**(2): 534–544. doi:10.1111/j.1469-  
736 8137.2008.02582.x.

- 737 Yang, J., Lovett- Doust, J., and Lovett- Doust, L. 1999. Seed germination patterns in green  
738 dragon (*Arisaema dracontium*, Araceae). *Am. J. Bot.* **86**(8): 1160–1167.  
739 doi:10.2307/2656980.
- 740 Yeaman, S., Hodgins, K.A., Lotterhos, K.E., Suren, H., Nadeau, S., Degner, J.C., Nurkowski,  
741 K.A., Smets, P., Wang, T., Gray, L.K., Liepe, K.J., Hamann, A., Holliday, J.A.,  
742 Whitlock, M.C., Rieseberg, L.H., and Aitken, S.N. 2016. Convergent local adaptation to  
743 climate in distantly related conifers. *Science* **353**(6306): 1431–1433.  
744 doi:10.1126/science.aaf7812.  
745

746 FIGURES AND TABLES

747

748 SUPPLEMENTARY INFORMATION

749 QUESTION 1

750 *Comparability of NatureServe and COSEWIC ranks*

751 Although Nature Conservancy and COSEWIC ranks use different numbers of categories (five  
752 and four, respectively), both are derived from IUCN criteria. To test whether the two bodies  
753 ranked taxa consistently, we converted COSEWIC ranks to numeric ranks from 4 (not-at-risk) to  
754 1 (endangered); as NatureServe did not give any species a 5 (least threatened) in Canada, both  
755 NatureServe Canadian ranks and numeric COSEWIC ranks varied from 1 to 4. We used a paired  
756 Wilcoxon test to assess whether COSEWIC and NatureServe ranks for Canadian populations  
757 differed overall. NatureServe and COSEWIC ranks did differ significantly, as NatureServe  
758 tended to consider taxa more nationally threatened than COSEWIC (Fig. S1).

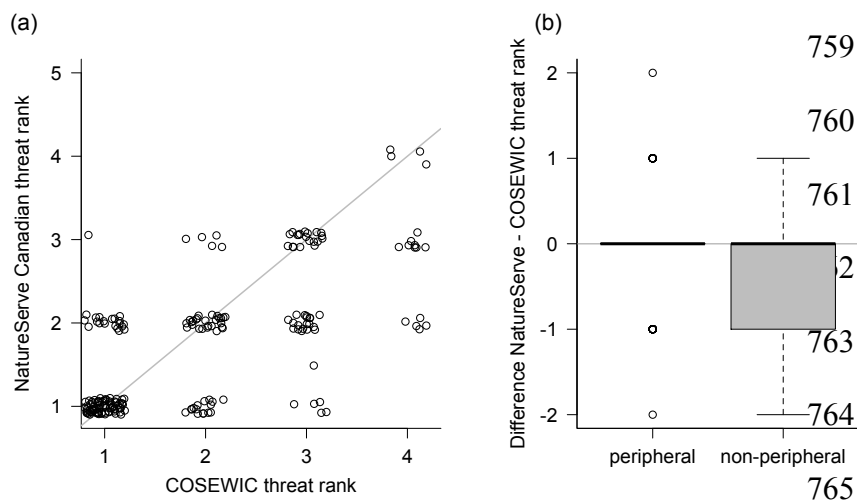

766 **Figure S1.** (a) NatureServe tended to consider taxa more threatened than COSEWIC, i.e. more  
767 points fall below the diagonal line reference line than above (1 = most threatened; Wilcoxon  
768 paired rank test = 924.5,  $P = 0.0003$ ). (b) This difference reflected higher threat rankings for  
769 non-peripheral taxa (Wilcoxon unpaired rank test = 4139,  $P = 0.016$ ). Centre lines and boxes  
770 show the median, 25th and 75th quartiles (R Core Team 2017).  
771

772 However, the systematic difference between NatureServe Canadian ranks and COSEWIC ranks  
773 did not alter conclusions for Q1. If we used COSEWIC ranks instead of NatureServe Canadian  
774 ranks to calculate the discrepancy between global and national conservation priority, peripheral  
775 taxa still have greater discrepancy than non-peripheral taxa (Fig. S2).

776

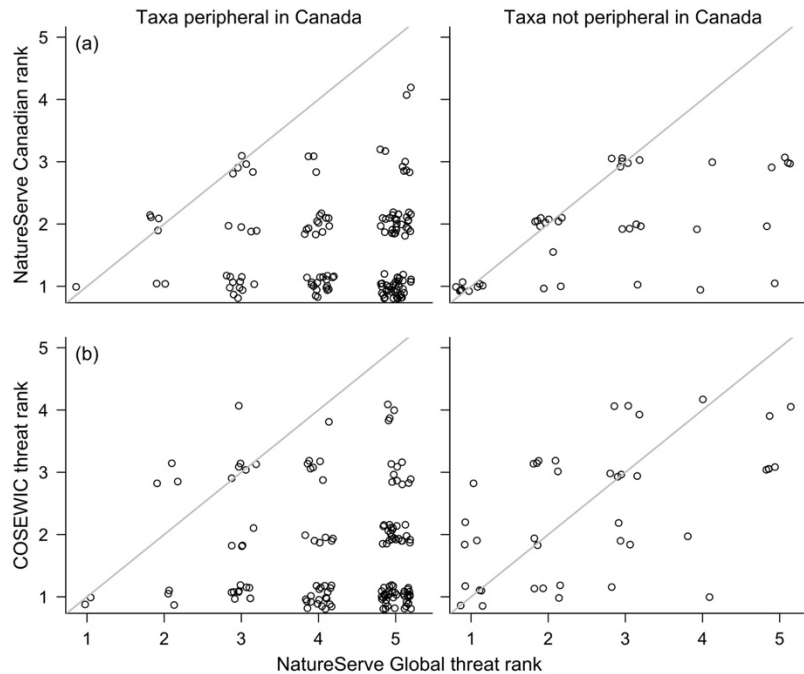

777

778 **Figure S2.** The disparity between national and global threat ranks is greater for species  
779 peripheral in Canada, whether one assesses Canadian threat using NatureServe Canadian ranks  
780 (shown in (a) – same data as depicted in Fig 2) or COSEWIC ranks (b: Wilcoxon unpaired test  
781 on whether the disparity between global and Canadian threat ranks differs between peripheral  
782 and non-peripheral taxa: 5877.5,  $P < 0.0001$ ). Diagonal lines indicate Canadian populations have  
783 the same threat ranking as the taxon globally. Taxa that are peripheral in Canada (left) have a  
784 greater mismatch between their Canadian and global threat ranks (more taxa listed as threatened  
785 in Canada but secure globally) than taxa with >20% of their range in Canada (right).

786

787 *Changing definition of peripheral*

788 Our main analyses used 202 taxa (Table 1c) and paired Wilcoxon tests to test disparity between

789 NatureServe Canadian and global rankings among taxa deemed peripheral in Canada (<20% of

790 global range in Canada, determined from digitized maps or maps and range descriptions) or non-  
791 peripheral. We tested the sensitivity to our definition of ‘peripheral’ by rerunning analyses using  
792 only taxa with a digitized range map and quantitative assessment of peripherality, and using a  
793 stricter threshold for ‘peripheral’ of 10% of range in Canada. Conclusions did not change (Table  
794 S1).

795

796 **Table S1.** Reanalysis of Question 1 with different definitions of peripheral. Top row gives  
797 results reported in the main paper.

| Definition of peripheral                                                                           | <i>n</i> taxa      |                              |
|----------------------------------------------------------------------------------------------------|--------------------|------------------------------|
|                                                                                                    | total (peripheral) | Wilcoxon <i>W</i> , <i>P</i> |
| <20% of range in Canada, determined from digitized maps or non-digitized maps & range descriptions | 202 (159)          | 5878, <i>P</i> < 0.0001      |
| <20% of range in Canada, determined from digitized maps only                                       | 175 (135)          | 4686, <i>P</i> < 0.0001      |
| ≤10% of range in Canada, determined from digitized maps only                                       | 175 (123)          | 684, <i>P</i> < 0.0001       |

798

799



800 QUESTION 2

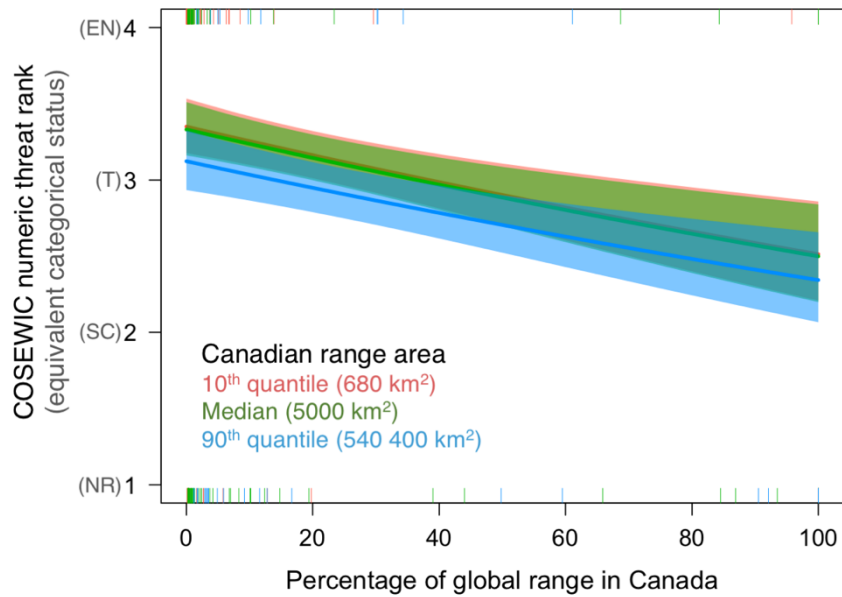

801

802 **Figure S3.** Being more peripheral (having a smaller % of global range) in Canada is associated  
803 with being more nationally threatened even after accounting for absolute range area in Canada  
804 (*Question 2*). QuasiPoisson GLM: numeric COSEWIC status ~ Canadian range area + Canadian  
805 range fraction. Canadian range area is numeric, but is displayed categorically to help visualize  
806 patterns.  
807

808 A colleague who served on COSEWIC's vascular plants subcommittee pointed out that the way  
809 COSEWIC prioritizes and assesses taxa changed once the Species at Risk Act was passed in  
810 2002, potentially reducing prioritization and ranking of peripheral populations. We tested this by  
811 re-running models in Question 2 with a categorical predictor denoting whether species had been  
812 assessed by COSEWIC before 2002. Taxa assessed before or after SARA did not vary in their  
813 global range area, Canadian range area, or fraction of their global range in Canada (Table S2).  
814 Taxa were designated as slightly more at risk after SARA passed (least squared mean numeric  
815 COSEWIC rank = 3.2, where 1=Not at risk and 4=Endangered), than before (mean = 2.5)

816 potentially indicating more effective prioritization. The effect of range area or percent on  
817 COSEWIC status did not differ between taxa assessed before or after SARA (model with vs.  
818 without interactions:  $\chi^2_{df=2}, P = 0.50$ ).

819

820 **Table S2.** Reanalyzing models in Question 2 accounting for whether taxa were assessed before  
821 or after SARA passed in 2002.

---

| Response                         | Predictors in model     | Predictor significance<br>$\chi^2_{df=1}, P$ |
|----------------------------------|-------------------------|----------------------------------------------|
| Global range area                | COSEWIC threat rank     | 7.50, $P = 0.057$                            |
|                                  | Before/After SARA       | 0.01, $P = 0.91$                             |
| Canadian range area              | COSEWIC threat rank     | 21.1, $P < 0.001$                            |
|                                  | Before/After SARA       | 3.3, $P = 0.070$                             |
| % range in Canada                | COSEWIC threat rank     | 13.8, $P = 0.003$                            |
|                                  | Before/After SARA       | 1.5, $P = 0.16$                              |
| COSEWIC threat rank<br>(numeric) | Canadian range area     | 11.7, $P < 0.0001$                           |
|                                  | Percent range in Canada | 4.7, $P < 0.031$                             |
|                                  | Before/After SARA       | 17.2, $P < 0.0001$                           |

---

822

823 QUESTION 5

824 *Changing definition of peripheral*

825 Our main analyses for Q5 used 189 at-risk taxa for which we could quantify or estimate  
 826 peripherality, defined as <20% of their global range in Canada (Table 1b). To test whether  
 827 conclusions were sensitive to this definition of peripheral, we reran analyses using only at-risk  
 828 taxa with a digitized range map and quantitative assessment of peripherality ( $n = 166$ ), and again  
 829 using a stricter threshold for ‘peripheral’ ( $\leq 10\%$  of range in Canada). The effect of being  
 830 peripheral generally remained non-significant, except for the number of studies that included  
 831 Canadian populations (Table S3).

832

833 **Table S3.** Reanalysis of Question 5 with different definitions of peripheral. Note that Q5  
 834 considers only at-risk taxa. Cells give  $\chi^2_{df=1}$  test statistics for effect of peripheral (yes or no) and  
 835 associated  $P$  values,  $df = 1$  in all cases. Leftmost results column gives results reported in main  
 836 manuscript, using all taxa for which peripherality could be quantified or estimated (Table 1b).

837

|                                                      | Threshold for peripheral (% global range in Canada) |                                |                                |
|------------------------------------------------------|-----------------------------------------------------|--------------------------------|--------------------------------|
|                                                      | Taxa considered                                     |                                |                                |
|                                                      | N species (peripheral spp)                          |                                |                                |
|                                                      | <20%                                                | <20%                           | $\leq 10\%$                    |
| GLM                                                  | COSEWIC map                                         | Digitized map                  | Digitized map                  |
| (error distribution)                                 | $n = 189$ (159)                                     | $n = 166$ (132)                | $n = 166$ (120)                |
| Likelihood studied anywhere<br>(qbinomial)           | $\chi^2 = 1.73$<br>$P = 0.19$                       | $\chi^2 = 1.71$<br>$P = 0.19$  | $\chi^2 = 0.02$<br>$P = 0.88$  |
| Studies per species<br>(negative binomial)           | $\chi^2 = 0.21$<br>$P = 0.88$                       | $\chi^2 = 0.26$<br>$P = 0.61$  | $\chi^2 = 1.10$<br>$P = 0.29$  |
| Likelihood studied in Canada<br>(qbinomial)          | $\chi^2 = 0.02$<br>$P = 0.90$                       | $\chi^2 = 0.12$<br>$P = 0.90$  | $\chi^2 = 1.32$<br>$P = 0.25$  |
| Studies per species in Canada<br>(negative binomial) | $\chi^2 = 2.72$<br>$P = 0.099$                      | $\chi^2 = 3.66$<br>$P = 0.056$ | $\chi^2 = 6.97$<br>$P = 0.008$ |

838
